# Supplementary material for: The heterogeneous reactions of toluene/O3/NH3 on hematite nanoparticles: the impact of light illumination on organic ammonium salt formation
Source: Royal Society of Chemistry journal article supplement (doi:10.1039/d3en00625e), 2023-11-15
Supplement: d3en00625e1.pdf [file d3en00625e1.pdf]

**Heterogeneous reactions of toluene/O<sub>3</sub>/NH<sub>3</sub> on hematite  
nanoparticles: the impacts of light illumination on organic  
ammonium salts formation**

Xin Liu<sup>1,2,3</sup>, Xiang He<sup>1,2,3,\*</sup>, Zhi-Cheng Ma<sup>1,2,3</sup>, Xi Xi<sup>1,2,3</sup>, Shuang-Xi Wang

<sup>1</sup> College of Ecology and Environment, Xinjiang University, Urumqi 830017, PR China

<sup>2</sup> Key Laboratory of Oasis Ecology, Ministry of Education, Xinjiang University, Urumqi 830017, PR China

<sup>3</sup> Xinjiang Jinghe Observation and Research Station of Temperate Desert Ecosystem, Ministry of Education, Xinjiang University, Urumqi 830017, PR China

\*Correspondence and requests for materials should be addressed to X. He (xianghe@xju.edu.cn)

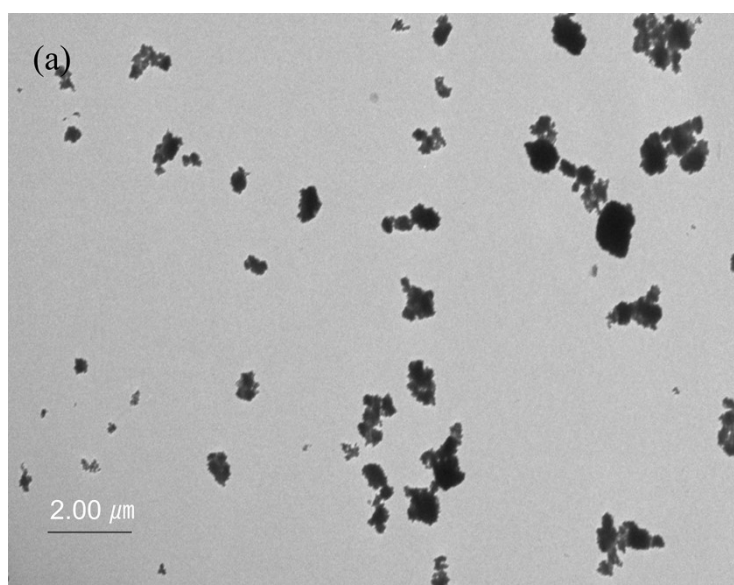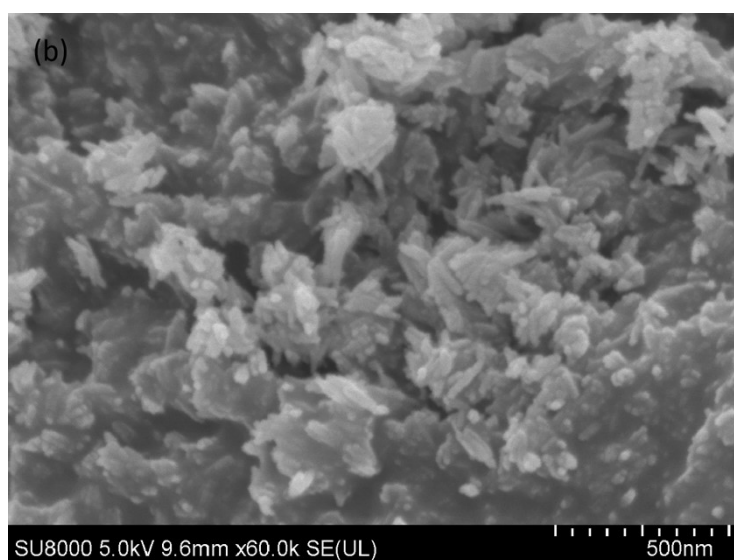

**Fig. S1** Characterization of hematite nanoparticles (a) Transmission Electron Microscope (b) Scanning Electron Microscope.

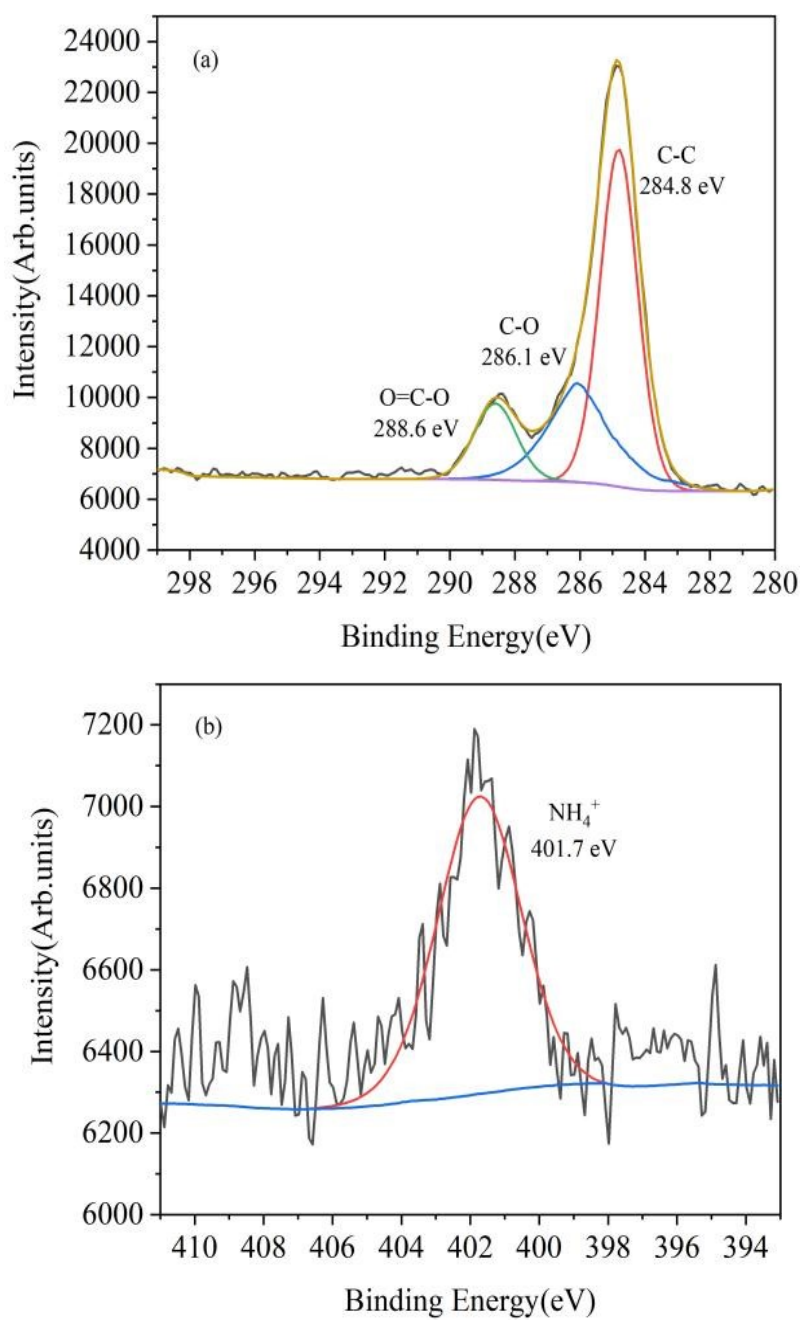

**Fig. S2** Peak fitting diagram of XPS elements after reaction of toluene/O<sub>3</sub>/NH<sub>3</sub> (a) C 1s (b) N 1s.

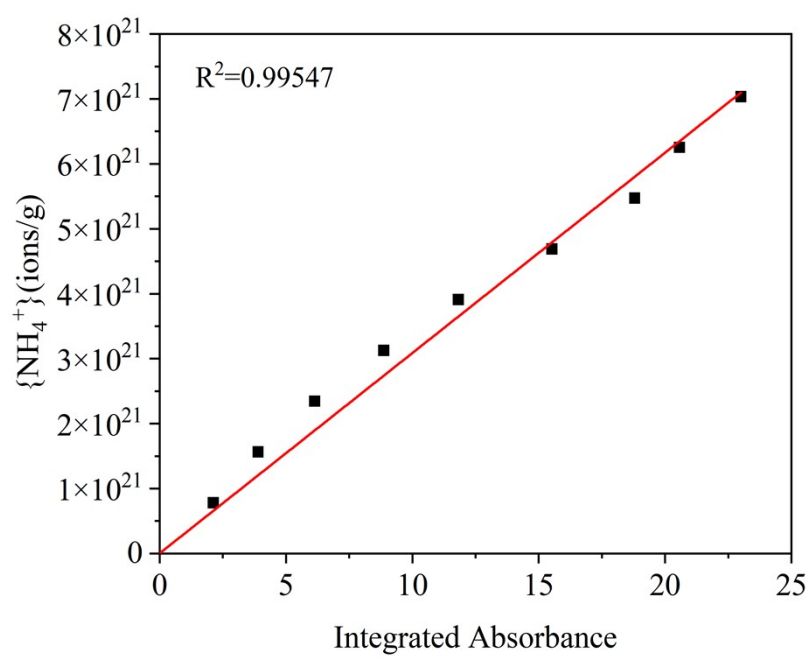

**Fig. S3** Calibration curve for the integrated absorbance versus the concentration of organic ammonium salts.
